# Supplementary material for: Pooling size sorted Malaise trap fractions to maximize taxon recovery with metabarcoding
Source: PubMed Central journal article supplement (PMC8500090; doi:10.7717/peerj.12177), 2021-10-05
Supplement: peerj-09-12177-s001.pdf [file peerj-09-12177-s001.pdf]

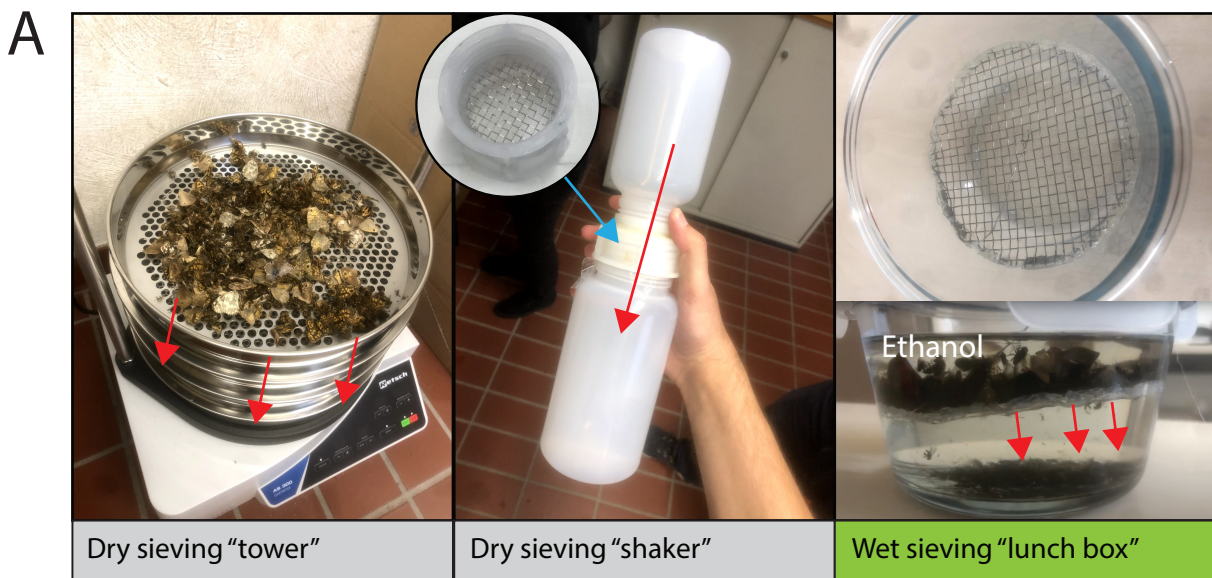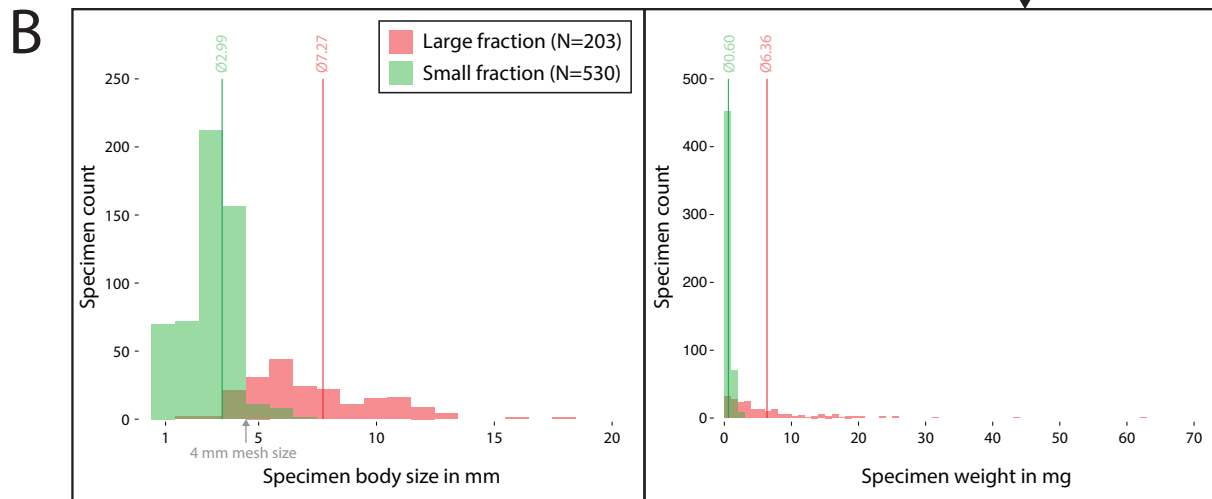

Fig. S1: Overview of tested size sorting strategies. A: Different dry sieving strategies ("tower" and "shaker", time consuming due to electrostatic charging of specimens) and wet sieving strategy in ethanol using a lunch box and a 4 mm metal mesh. B: Histogram showing the size and weight differences of one additional malaise sample from Vlotho (52.122705N, 8.785186E) wet sieved into two size fractions using the "lunch box" design. Specimen body size refers to length measurements of specimens measured on millimeter scale paper without antennae or legs.
