# Supplementary material for: Pooling size sorted Malaise trap fractions to maximize taxon recovery with metabarcoding
Source: PubMed Central journal article supplement (PMC8500090; doi:10.7717/peerj.12177), 2021-10-05
Supplement: peerj-09-12177-s002.pdf [file peerj-09-12177-s002.pdf]

| index 2: | S517                | S511                      | S510                   | S508                | S507                      | S506                      | S505                   | S503                       |
|----------|---------------------|---------------------------|------------------------|---------------------|---------------------------|---------------------------|------------------------|----------------------------|
|          | H                   | G                         | F                      | E                   | D                         | C                         | B                      | A                          |
|          | <b>D</b>            | <b>D</b>                  | <b>D</b>               | <b>D</b>            | <b>D</b>                  | <b>D</b>                  | <b>D</b>               | <b>D</b>                   |
| index 1: |                     |                           |                        |                     |                           |                           |                        |                            |
| N702 1   | C01                 | L1_MA                     | L1_XLB                 | L2_fiboA            | L2_equB                   | L2_SB                     | L3_XLA                 | L3_logB                    |
|          | <b>D</b>            | <b>D</b>                  | <b>D</b>               | <b>D</b>            | <b>D</b>                  | <b>D</b>                  | <b>D</b>               | <b>D</b>                   |
| N703 2   | L1_gA               | L1_SA                     | L1_LB                  | L2_4xA              | L2_logB                   | L3_gA                     | L3_LA                  | C2                         |
|          | <b>D</b>            | <b>D</b>                  | <b>D</b>               | <b>D</b>            | <b>D</b>                  | <b>D</b>                  | <b>D</b>               | <b>D</b>                   |
| N704 3   | L1_invgA            | L1_gB                     | L1_MB                  | C03                 | L2_fiboB                  | L3_invgA                  | L3_MA                  | L3_fiboB                   |
|          | <b>D</b>            | <b>D</b>                  | <b>D</b>               | <b>D</b>            | <b>D</b>                  | <b>D</b>                  | <b>D</b>               | <b>D</b>                   |
| N705 4   | L1_equA             | L1_invgB                  | L1_SB                  | L2_XLA              | L2_4xB                    | C4                        | L3_SA                  | L3_4xB                     |
|          | <b>D</b>            | <b>D</b>                  | <b>D</b>               | <b>D</b>            | <b>D</b>                  | <b>D</b>                  | <b>D</b>               | <b>D</b>                   |
| N711 5   | L1_logA             | C05                       | L2_gA                  | L2_LA               | L2_XLB                    | L3_equA                   | L3_gB                  | L3_XLB                     |
|          | <b>D</b>            | <b>D</b>                  | <b>D</b>               | <b>D</b>            | <b>D</b>                  | <b>D</b>                  | <b>D</b>               | <b>D</b>                   |
| N712 6   | L1_fiboA            | L1_equB                   | L2_invgA               | L2_MA               | C6                        | L3_logA                   | L3_invgB               | L3_LB                      |
|          | <b>D</b>            | <b>D</b>                  | <b>D</b>               | <b>D</b>            | <b>D</b>                  | <b>D</b>                  | <b>D</b>               | <b>D</b>                   |
| N714 7   | L1_4xA              | L1_logB                   | C07                    | L2_SA               | L2_LB                     | L3_fiboA                  | L3_equB                | L3_MB                      |
|          | <b>D</b>            | <b>D</b>                  | <b>D</b>               | <b>D</b>            | <b>D</b>                  | <b>D</b>                  | <b>D</b>               | <b>D</b>                   |
| N715 8   | L1_XLA              | L1_fiboB                  | L2_equA                | L2_gB               | L2_MB                     | L3_4xA                    | C8                     | L3_SB                      |
|          | <b>D</b>            | <b>D</b>                  | <b>D</b>               | <b>D</b>            | <b>D</b>                  | <b>C</b>                  | <b>C</b>               | <b>D</b>                   |
| N718 9   | L1_LA               | L1_4xB                    | L2_logA                | L2_invgB            | C9                        | <b>101</b><br>101_3       | <b>Kit_M</b><br>Kit_M3 | <b>118abd</b><br>Abd_mock4 |
|          | <b>A</b>            | <b>A</b>                  | <b>A</b>               | <b>B</b>            | <b>B</b>                  | <b>C</b>                  | <b>D</b>               | <b>C</b>                   |
| N723 10  | <b>A_M</b><br>A_M1  | <b>103</b><br>103_1       | <b>Kit_M</b><br>Kit_M1 | <b>103</b><br>103_2 | <b>44.1</b><br>GBOL_mock2 | <b>103</b><br>103_3       | <b>A_M</b><br>A_M4     |                            |
|          | <b>A</b>            | <b>A</b>                  | <b>B</b>               | <b>B</b>            | <b>B</b>                  | <b>C</b>                  | <b>D</b>               | <b>D</b>                   |
| N724 11  | C11                 | Abd_mock1                 | A_M2                   | Abd_mock2           | Kit_M2                    | Abd_mock3                 | 101_4                  | GBOL_mock4                 |
|          | <b>A</b>            | <b>A</b>                  | <b>B</b>               | <b>B</b>            | <b>C</b>                  | <b>C</b>                  | <b>D</b>               | <b>D</b>                   |
| N727 12  | <b>101</b><br>101_1 | <b>44.1</b><br>GBOL_mock1 | <b>101</b><br>101_2    |                     | <b>A_M</b><br>A_M3        | <b>44.1</b><br>GBOL_mock3 | <b>103</b><br>103_4    | <b>Kit_M</b><br>Kit_M4     |

Fig. S2: Plate map for the DNA extraction from the 69 lysate samples (including 9 negative controls), marked in green. Unmarked wells were part of another project sequenced on the same run. Additionally, the Illumina indexing used for PCR2 is indicated for each row (N702-N272) and column (S517-S503).
