# Supplementary material for: Pooling size sorted Malaise trap fractions to maximize taxon recovery with metabarcoding
Source: PubMed Central journal article supplement (PMC8500090; doi:10.7717/peerj.12177), 2021-10-05
Supplement: peerj-09-12177-s006.pdf [file peerj-09-12177-s006.pdf]

A) Jaccard dissimilarity

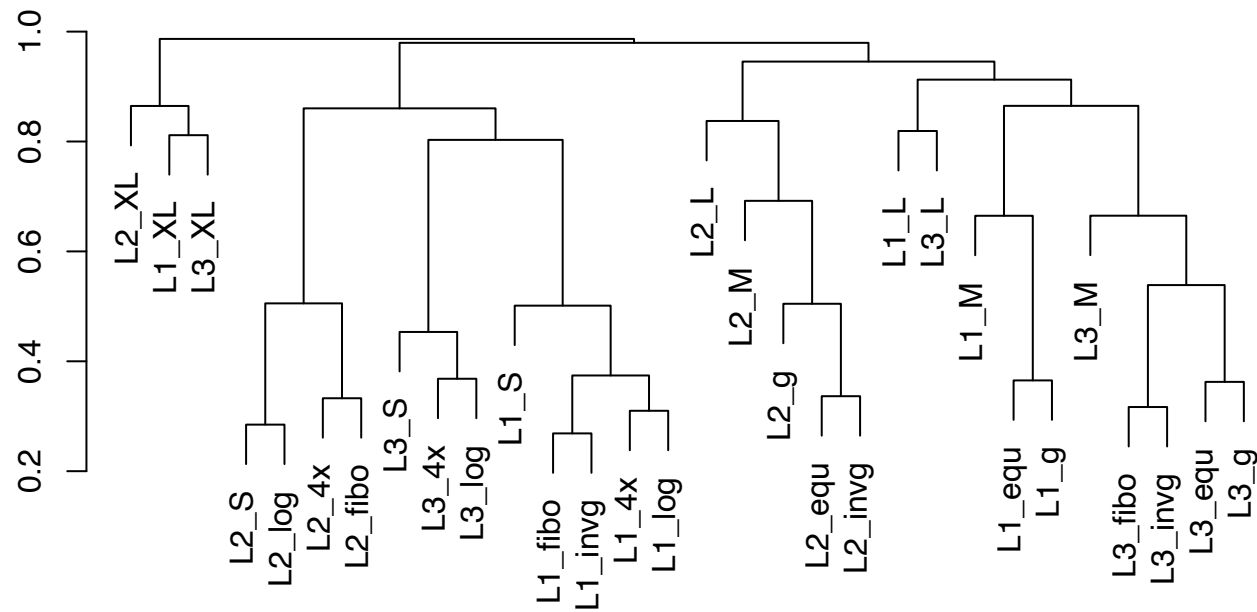

B) Bray-Curtis dissimilarity

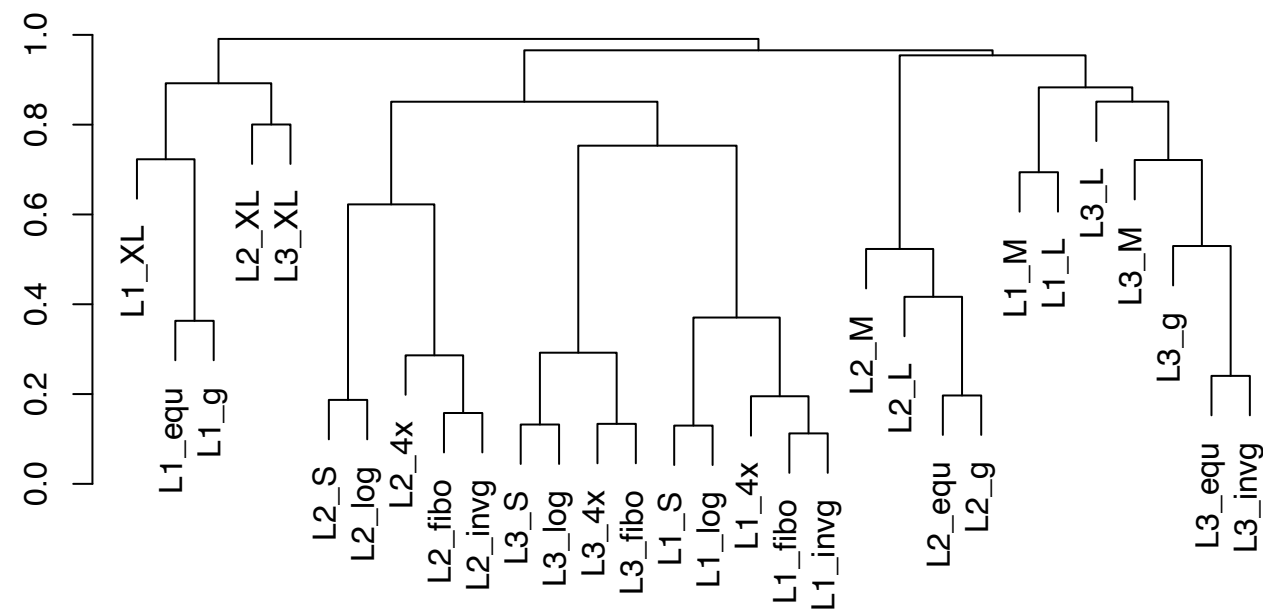

Fig. S6: Dendrogram of dissimilarity indices including A) Jaccard and B) Bray-Curtis (right) dissimilarity. Both analysis include separated sequenced size classes of the three samples (L1-L3) and samples processed in different pooling strategies (g, log<sub>10</sub>, invg, fibo, equ, 4x).
